1 **Genome-wide analyses of variance in blood cell phenotypes provide new**  
2 **insights into complex trait biology and prediction**  
3

4 Ruidong Xiang<sup>1-5,\*</sup>, Yang Liu<sup>1,2,6-9</sup>, Chief Ben-Eghan<sup>2,6-9</sup>, Scott Ritchie<sup>1,2,6-9</sup>, Samuel A.  
5 Lambert<sup>1,2,6-9</sup>, Yu Xu<sup>2,6-9</sup>, Fumihiko Takeuchi<sup>1,10</sup> and Michael Inouye<sup>1,2,6-9,\*</sup>  
6

7 1. Cambridge Baker Systems Genomics Initiative, Baker Heart and Diabetes Institute, Melbourne,  
8 Victoria, Australia

9 2. Cambridge Baker Systems Genomics Initiative, Department of Public Health and Primary Care,  
10 University of Cambridge, Cambridge, UK

11 3. Agriculture Victoria, AgriBio, Centre for AgriBioscience, Bundoora, Victoria 3083, Australia

12 4. Baker Department of Cardiovascular Research, Translation and Implementation, La Trobe University,  
13 Melbourne, VIC, 3086, Australia

14 5. Baker Department of Cardiometabolic Health, The University of Melbourne, VIC, 3010, Australia

15 6. British Heart Foundation Cardiovascular Epidemiology Unit, Department of Public Health and Primary  
16 Care, University of Cambridge, Cambridge, UK

17 7. Victor Phillip Dahdaleh Heart and Lung Research Institute, University of Cambridge, Cambridge, UK

18 8. Health Data Research UK Cambridge, Wellcome Genome Campus and University of Cambridge,  
19 Cambridge, UK

20 9. British Heart Foundation Centre of Research Excellence, University of Cambridge, Cambridge, UK

21 10. Department of Gene Diagnostics and Therapeutics, Research Institute, National Center for Global  
22 Health and Medicine, Tokyo, Japan

23 \* Correspondence: R.X. (ruidong.xiang@agriculture.vic.gov.au) and M.I. (mi336@cam.ac.uk)  
24  
25

26 **Abstract**

27           Blood cell phenotypes are routinely tested in healthcare to inform clinical decisions.  
28 Genetic variants influencing mean blood cell phenotypes have been used to understand  
29 disease aetiology and improve prediction; however, additional information may be captured  
30 by genetic effects on observed variance. Here, we mapped variance quantitative trait loci  
31 (vQTL), i.e. genetic loci associated with trait variance, for 29 blood cell phenotypes from the  
32 UK Biobank (N~408,111). We discovered 176 independent blood cell vQTLs, of which 147  
33 were not found by additive QTL mapping. vQTLs displayed on average 1.8-fold stronger  
34 negative selection than additive QTL, highlighting that selection acts to reduce extreme blood  
35 cell phenotypes. Variance polygenic scores (vPGSs) were constructed to stratify individuals  
36 in the INTERVAL cohort (N~40,466), where genetically less variable individuals (low  
37 vPGS) had increased conventional PGS accuracy (by ~19%) than genetically more variable  
38 individuals. Genetic prediction of blood cell traits improved by ~10% on average combining  
39 PGS with vPGS. Using Mendelian randomisation and vPGS association analyses, we found  
40 that alcohol consumption significantly increased blood cell trait variances highlighting the  
41 utility of blood cell vQTLs and vPGSs to provide novel insight into phenotype aetiology as  
42 well as improve prediction.

43

44

## 45 **Introduction**

46           The complete blood count is amongst the most routinely ordered clinical laboratory  
47 tests performed globally<sup>1</sup>. Blood cells play crucial roles in a variety of biological processes,  
48 such as oxygen transport, iron homeostasis, and pathogen clearance<sup>2-4</sup>, and serve as key  
49 biological conduits for interactions between an individual and their environment. The genetic  
50 architecture of blood cell traits has been recently elucidated by genome-wide association  
51 studies (GWAS)<sup>5,6</sup> and, consistent with their well-known role in disease and clinical testing,  
52 blood cell traits are both highly heritable and have been genetically linked to many diseases,  
53 including cardiovascular diseases<sup>7</sup>, mental disorders<sup>8</sup> and autoimmune diseases<sup>9</sup>.

54           Despite the success of GWAS, our understanding of the genetic architecture of complex  
55 traits has been limited by a focus on mean trait values and how these change with respect to  
56 genotype. The genetics of trait variance, how individual measurements deviate from the mean  
57 trait value across genotypes, is far less studied. It has long been known that trait variance, e.g.  
58 for gene expression<sup>10,11</sup> and metabolic rate<sup>12</sup>, plays a role in an organism's fitness and  
59 phenotypic penetrance. Theories support the existence of selection on trait variance to improve  
60 fitness<sup>13,14</sup>. However, there are limited observations of selection on clinically significant traits.  
61 Variance quantitative trait loci (vQTLs) have been identified for human body composition  
62 traits, such as BMI<sup>15,16</sup>, and for cardiometabolic biomarkers<sup>17</sup>. vQTLs have also been linked to  
63 gene-by-environment interactions (GxE) or gene-by-gene interactions (GxG)<sup>15-18</sup>. vQTL  
64 studies of blood cell traits are currently lacking, despite their central role in biological processes  
65 and ubiquity in clinical testing.

66           Polygenic scores (PGS) are being intensively studied in various ways to determine their  
67 utility in clinical practice<sup>19-21</sup>. PGS for blood cell traits, in particular, are both highly predictive  
68 and show sex- and age-specific interactions<sup>6,7</sup>. How to treat trait variance and vQTLs with  
69 respect to phenotype prediction is relatively unexplored. A variance PGS (vPGS) to predict the

70 trait variance may be estimated from the effect sizes obtained from a genome-wide vQTL  
71 analysis. In theory, a PGS is different from a vPGS, where the former may be used to stratify  
72 individuals based on the inherited trait level while the latter stratifies individuals based on the  
73 inherited deviation of individuals from the population mean. It is known that the accuracy of a  
74 PGS varies across individuals as a function of the genetic distance from the reference  
75 population<sup>22</sup>. As a vPGS may represent the outcome of GxE<sup>16</sup> or GxG due to the nature of  
76 vQTLs<sup>15</sup>, examining a PGS alongside vPGS may reveal individual variability in PGS accuracy  
77 that can be accommodated.

78 Here, we conduct genome-wide vQTL analysis for 29 blood cell traits in the UK  
79 Biobank<sup>6,7</sup> and the INTERVAL cohort<sup>23</sup>. We compared the discovered vQTL with  
80 conventional QTL and analysed vPGS with conventional PGS in the prediction of blood cell  
81 traits. We found novel vQTL, not identified by previous conventional GWAS and displayed  
82 strong selection to reduce blood cell trait variances. Finally, we demonstrate the use of vPGS  
83 in stratifying individuals, resulting in differing PGS performance, and then show that PGS  
84 performance within vPGS strata is associated with lifestyle factors.

85

## 86 **Results**

87

### 88 *Genome-wide discovery and annotation of vQTLs in the UK Biobank*

89 We performed GWAS of variance in 29 blood cell traits from the UKB<sup>17,18</sup> (Average  
90 sample size = 402,142, **Supplementary Table 1**). The processing of phenotypes and genotypes  
91 followed previously established protocols with stringent quality control and normalisation  
92 procedures<sup>5-7</sup>. Levene's test<sup>24</sup>, as implemented in OSCA<sup>25</sup>, was used to map vQTLs for each of  
93 the 29 blood cell traits and the inflation factors and lambda GC were assessed using LD Score  
94 regression (LDSC)<sup>26</sup>. Across the 29 traits, the average lambda GC and LDSC intercepts were

95 1.03 and 1.007, respectively (**Supplementary Table 2**), indicating negligible inflation. At a  
96 study-wide significance level of  $p < 4.6 \times 10^{-9}$  and with clumping  $r^2 < 0.01$ , we identified 176  
97 independent vQTLs (**Figure 1a, Supplementary Table 3, Methods**).

98 Basophil cell count (baso) and basophil percentage of white cells (baso\_p) yielded the  
99 largest number of independent vQTLs ( $N = 27$  and  $23$ , respectively), whereas high light scatter  
100 reticulocyte count (hlc) did not have any study-wide significant vQTLs (**Supplementary Table**  
101 **4**). Most vQTL were associated with the variance of only one or two traits and many of these  
102 traits are correlated (**Supplementary Figure 1 and Supplementary Table 3**). By counting the  
103 number of blood cell traits associated, the most pleiotropic lead vQTL was located in gene  
104 *HBM* (hemoglobin subunit mu) and was associated with the variance of four traits (red blood  
105 cell count, mean corpuscular volume, mean corpuscular hemoglobin and mean corpuscular  
106 hemoglobin concentration, **Supplementary Table 3**). The second pleiotropic lead vQTL  
107 related to long intergenic non-coding RNA *LINC02768* was associated with 3 traits [monocyte  
108 percentage of white cells (mono\_p), baso and baso\_p, **Figure 1b**]. To account for the  
109 phenotypic correlations, the pleiotropy of trait variance was further assessed using HOPS<sup>27</sup>,  
110 which found that 495 SNPs (out of 71,216 input SNPs) showed significant pleiotropy  
111 (**Supplementary Table 5**). In this analysis, the most significant pleiotropic locus was  
112 *LINC02768* (**Supplementary Table 5**).

113 vQTLs were largely distinct from additive QTLs. Of 176 lead vQTLs, 147 were not  
114 detected as additive QTLs by Vuckovic et al<sup>6</sup>, the largest GWAS to date of blood cell traits.  
115 vQTLs had an average  $r^2$  of 0.33 (SD=0.12) with the lead additive QTLs from Vuckovic et al<sup>6</sup>  
116 (**Supplementary Figure 2**). We repeated the OSCA<sup>25</sup> analysis fitting the trait level as a  
117 covariate, i.e. effects of vQTL conditioned on the trait level. The correlation of the effects of  
118 these vQTLs between the original and conditional analysis was 0.99 (**Supplementary Figure**  
119 **3**), consistent with vQTL effects being independent of those for mean trait level.

120           Across 29 traits, the magnitude of the genetic correlation between trait variance and  
121 trait level, as estimated by LDSC<sup>26</sup>, was on average 0.328 (SD=0.24) (**Figure 1c**) and the  
122 genetic correlation between trait variance and value was not significant for 21 out of 29 traits  
123 after adjusting for multi-testing. Notably, red cell distribution width (rdw) and neutrophil  
124 percentage of white cells (neut\_p) had significant negative genetic correlations after adjustment  
125 for multiple testing, indicating genetic control of trait variance so it is reduced at high levels of  
126 rdw or neut\_p. Rdw is itself a measure of variation; however, high rdw is an indicator of iron  
127 or other nutrient deficiencies, thus our results suggest a potential simultaneous genetic  
128 stabilisation when rdw is genetically high. Similarly, high neut\_p is an indicator of microbial  
129 or inflammatory stress, thus a negative genetic correlation suggests a stabilisation at genetically  
130 high neut\_p levels.

131           With many known trait-associated alleles under negative selection<sup>28</sup>, we also assessed  
132 the extent to which QTLs for trait variability are under selection. We used Bayes(S)<sup>28</sup>, to  
133 compare the selection coefficient (S) between vQTLs and additive QTLs across 29 blood cell  
134 traits (**Figure 1d**). We found that, on average S is 1.8 times stronger on trait variance (-0.82,  
135 SD=0.07) than trait level (-0.45, SD=0.05) (**Figure 1d**). These results show a much stronger  
136 negative selection on blood cell trait variance than on trait level. While it can be difficult to  
137 differentiate between negative and stabilising selection, our results are consistent with  
138 evolution acting on blood cell traits to remove extreme phenotypes from the population.

139           We used FUMA<sup>25</sup> to annotate the lead vQTLs for each trait (**Supplementary Data 1**  
140 **and Supplementary Table 6**) and perform a trait enrichment analysis with GWAS Catalog<sup>23</sup>.  
141 We found multiple significant overlaps between vQTL and additive QTL related to alcohol  
142 consumption. Significant vQTLs (rs191673261 in LD with lead vQTL rs572454376) for  
143 platelet crit (pct) were located proximal to *ALDH2*, a well-known gene contributing to alcohol  
144 consumption<sup>29</sup> (**Figure 2a**). We subsequently performed Summary-data-based Mendelian

145 Randomisation (GSMR)<sup>30</sup> between GWAS of alcohol consumption (as exposure, obtained  
146 from Cole et al 2020<sup>31</sup>) and variances of blood cell traits (as outcome). We also used MR-  
147 PRESSOR<sup>32</sup> and MR-weighted median<sup>33</sup> to validate our results with different assumptions. We  
148 did not find statistically significant causal links between alcohol consumption and pct.  
149 However, at multi-testing adjusted  $p < 0.05$  level, increased alcohol consumption was  
150 genetically predicted to increase variance in mean corpuscular volume (mcv) and mean sphered  
151 corpuscular volume (mscv) (**Figure 2b-d**). At nominal significance ( $p < 0.05$  for each of the  
152 three MR methods), increased alcohol consumption was genetically predicted to increase  
153 variance in red blood cell count (rbc) and neutrophil percentage of white cells (neut\_p) (**Figure**  
154 **2b**). The positive effects of alcohol consumption on neutrophil count (neut) were significant in  
155 GSMR (nominal  $p = 0.014$ ) and MR-PRESSO (nominal  $p=0.008$ ), but insignificant (nominal  
156  $p=0.1$ ) in MR-weighted median. Overall, our results support alcohol consumption as affecting  
157 particular blood cell trait variances.

158 FUMA-enabled ANNOVAR<sup>24</sup> was used to study the enrichment of vQTLs in  
159 different functional annotation classes. We found that vQTLs for mean sphered corpuscular  
160 volume (mscv), reticulocyte count (ret) and reticulocyte fraction of red cells (ret\_p) were  
161 significantly enriched in exonic variants related to protein-coding functions (**Supplementary**  
162 **Figure 4a**). However, vQTLs for many other traits were enriched in regulatory regions. For  
163 example, vQTLs for mean corpuscular hemoglobin concentration, red blood cell count and  
164 hemoglobin concentration (hgb) were enriched for upstream gene regulatory sites. vQTLs for  
165 eosinophil count (eo), mean corpuscular hemoglobin and mean corpuscular volume were  
166 enriched for downstream regulatory sites of genes. vQTLs for platelet distribution width  
167 (pdw) and basophil percentage of white cells (baso\_p) were enriched for UTR-3' sites  
168 (**Supplementary Figure 4a**). We used pathway enrichment analyses within FUMA to further  
169 investigate whether vQTLs were enriched for gene regulation, finding that vQTLs for mean

170 corpuscular hemoglobin were enriched for many epigenetic regulatory mechanisms including  
171 DNA methylation and histone modifications (**Supplementary Figure 4b**).

172

### 173 *Polygenic scores of blood cell trait variance*

174 Polygenic scores are conventionally constructed for differences in trait level. Using  
175 the vQTL results from the UK Biobank, we constructed polygenic scores for blood cell trait  
176 variance (vPGS) using PRSICE<sup>34</sup> and the INTERVAL study as an external validation cohort  
177 (**Supplementary Table 1, Methods**). For conventional PGS we utilised those from Xu et al<sup>7</sup>.  
178 Across traits, there was nearly zero Pearson correlation between vPGS and PGS (mean  
179 0.00028, range [-0.018, 0.023]; **Supplementary Figure 5**), consistent with PGS for trait  
180 variance being independent from those for mean trait levels.

181 A potential use of vPGS is to stratify a population by trait variance, thus identifying  
182 subgroups where predictive models may have increased performance. For each trait, we  
183 stratified individuals into the top and bottom 5% of vPGS. As vPGS were trained to estimate  
184 SNP effects on trait variance, individuals with lower or higher vPGS were expected to  
185 display less or more variation around the trait mean, respectively. We then compared the  
186 correlation of PGSs for each trait between these more (high-vPGS) or less variable (low-  
187 vPGS) groups. Across the 27 blood cell traits, we found the less variable group (bottom 5%  
188 of vPGS) had a significantly higher PGS-trait correlation than the more variable group (top  
189 5% vPGS) (**Figure 3**). Across all traits, the mean relative difference in PGS-trait correlation  
190 (Pearson) between the less and more variable groups was +6.5% [-7%, 18%] (**Figure 3**), with  
191 a mean difference of +6.6% [-9%, 19%] for spearman correlation (**Supplementary Figure**  
192 **6**).

193 Next, we analysed the effects of interaction between PGS and vPGS for each trait. We  
194 found that 6 out of 27 blood cell traits displayed statistically significant ( $p < 0.05$ ) effects of



195 interaction between PGS and vPGS (**Figure 4a**), suggesting that associations between PGS  
196 and blood cell trait level can depend on vPGS (**Figure 4b-c**).

197         Next, for all INTERVAL individuals, we examined whether adding vPGS to PGS  
198 increased the prediction of blood cell trait level. For each blood cell trait, we estimated the  
199 difference in the variance explained ( $R^2$ ) between PGS models with or without vPGS (**Figure**  
200 **5, Methods**). Across all 27 traits, the mean  $R^2$  increase was +1.8% (range [0%, 5%]) and 9  
201 traits showed a statistically significant<sup>35</sup> increase in  $R^2$  (**Figure 5, Methods**). We further  
202 tested whether multi-trait vPGSs also increase prediction power<sup>36</sup>, and found that adding  
203 multi-trait vPGSs to PGS increased  $R^2$  by a mean of +3.5% (range [0%, 10%]) and the  
204 increase was statistically significant in 16 traits (**Figure 5**).

205

#### 206 *Lifestyle effects on blood cell trait variance*

207         To investigate why some individuals have highly variable blood cell trait levels we  
208 assessed two major lifestyle factors, namely alcohol consumption and smoking behaviour.  
209 We first identified distinct groups of individuals with high or low trait variance in  
210 INTERVAL. For the high variability trait group, we identified individuals who were in the  
211 top 5% of vPGS for at least 4 blood cell traits and, for the low variability trait group, with  
212 individuals in the bottom 5% of vPGS for at least 4 traits (**Methods, Figure 6**). Our analysis  
213 found that those in the high variability trait group were more likely to be current or previous  
214 consumers of alcohol (**Figure 6a**). Further, we applied this analysis to mcv, neut\_p and rbc,  
215 finding significant causal effects of alcohol consumption in GSMR analyses (**Figure 2a,**  
216 mscv not available in INTERVAL). Consistent with the results from GSMR, individuals with  
217 high variability in mcv, neut\_p and rbc were more likely to be alcohol consumers (**Figure**  
218 **6b**). These results support the hypothesis that alcohol consumption increases variation in  
219 blood cell traits.

220

## 221 **Discussion**

222           The analysis of vQTL and vPGS may yield new insights into locus and GxE  
223 discovery as well as the use of human genetics for patient stratification. Our study explored  
224 vQTL analysis in 29 blood cell traits in the UK Biobank, where the majority (84%) of vQTLs  
225 did not overlap with and were largely independent of genetic variants identified in  
226 conventional GWAS of trait mean. We investigated the functional annotation, pathway-level  
227 associations and selection of vQTLs. The potential utility of using vQTLs to construct vPGS  
228 and using the latter to stratify the population into groups of trait variance was demonstrated.  
229 Finally, our analysis also showed trait variance to be related to non-genetic factors, finding  
230 that alcohol consumption had a putatively causal effect on increasing blood cell trait  
231 variances.

232           Both blood cell trait variance and level display significant negative selection.  
233 Stabilising selection of human traits has been reported<sup>14</sup>. However, to our knowledge,  
234 negative selection on blood cell trait variance, particularly its strength relative to that on trait  
235 level, has not yet been identified. Strong negative selection of blood cell trait variances  
236 suggests that extreme blood cell morphologies, which may be indicative of diseases, have not  
237 been favoured.

238           Many vQTLs tagged loci implicated in GxG, GxE and under epigenetic regulation,  
239 consistent with previous studies of vQTLs<sup>18,37</sup>. We found blood cell vQTLs tagged genes  
240 related to diet. Previous GWAS of diet identified loci related to blood lipids<sup>38</sup> and glycated  
241 hemoglobin<sup>39</sup> but not to blood cell traits analysed here; however, others have reported that  
242 alcohol intake increases mean corpuscular volume independent of the genetic contribution to  
243 the level of mean corpuscular volume<sup>40</sup>. In our study, alcohol consumption-related loci

244 significantly overlapped with vQTLs for platelet count, the function of which can be  
245 significantly affected by alcohol drinking<sup>41</sup>.

246 Stratification by vPGS was shown to identify groups with significantly different PGS  
247 prediction accuracy, indicating that some groups are intrinsically harder to predict by PGSs  
248 than others. Such information may be important for the implementation of PGSs in  
249 healthcare. Interestingly, our analysis also found multiple significant interactions between  
250 PGS and vPGS, suggesting that the non-additive and GxE components related to PGSs could  
251 impact prediction accuracy. These findings are consistent with previous observations<sup>42,43</sup>.

252 Our results also showed that alcohol consumption and, to some extent increased BMI,  
253 were significant contributors to increased genetic variability in blood cell traits. Previously  
254 reports have found that blood cell traits can be significantly influenced by alcohol intake<sup>44</sup>  
255 and BMI<sup>45</sup>. However, to our knowledge, this is the first study to report lifestyle risk factors  
256 contributing to genetically predicted variation in blood cell traits.

257 In conclusion, our study provides an in-depth analysis of human genetic effects on the  
258 variance of blood cell traits, including the discovery of loci and strong negative selection,  
259 improved genomic prediction and stratification, and identification of GxE. vPGSs may  
260 provide a generalisable approach to incorporate individual differences to improve trait and  
261 disease risk prediction. This study demonstrates that there is substantive human biology and  
262 potential clinical utility in studying trait variances alongside conventional studies of trait  
263 means.

264

## 265 **Methods and Materials**

266

### 267 **Study Cohorts and Methods**

268           **UK Biobank.** The UK Biobank<sup>46,47</sup> (<https://www.ukbiobank.ac.uk/>) is a cohort  
269 including 500,000 individuals living in the UK who were recruited between 2006 and 2010,  
270 aged between 40 and 69 years at recruitment. Ethics approval was obtained from the North  
271 West Multi-Center Research Ethics Committee. The current analysis was approved under UK  
272 Biobank Project 30418. The participants with the measurements of the 29 blood cell traits  
273 and who were identified as European ancestry based on their genetic component analysis  
274 were included in our study. The detailed sample sizes used for vQTL detection were shown in  
275 **Supplementary Table 1.**

276           **INTERVAL Study.** INTERVAL<sup>23</sup> (<https://www.intervalstudy.org.uk/>) is a  
277 randomised trial of 50,000 healthy blood donors, aged 18 years or older at recruitment. The  
278 participants with measurements of the 27 considered blood cell traits were included in our  
279 study. The detailed sample sizes were shown in **Supplementary Table 1.** All participants  
280 have given informed consent and this study was approved by the National Research Ethics  
281 Service (11/EE/0538).

282           **Data quality control.** For trait levels of 29 blood cell traits in the UK Biobank and  
283 matching 27 traits in the INTERVAL, we adopted previously established protocols for  
284 quality controls<sup>5-7</sup> to adjust technical and other confounders and the first 10 genetic principal  
285 components. For trait levels, adjusted technical variables include the time between  
286 venepuncture and full blood cell analysis, seasonal effects, center of sample collection, the  
287 time-dependent drift of equipment, and systematic differences in equipment; other adjusted  
288 variables included sex, age, diet, smoking and alcohol consumption. Quality control and  
289 imputation of the genotype data have been described previously<sup>5,47</sup>, which filtered the  
290 samples to the European ancestry only.

291           **vQTL analysis.** Genome-wide analysis of vQTL used Levene's test. As detailed in  
292 <sup>11,15</sup>, the test statistic of Levene's test is:

293 
$$\frac{(n - k) \sum_{i=1}^k n_i (z_{i.} - z_{..})^2}{(k - 1) \sum_{i=1}^k \sum_{j=1}^{n_i} (z_{ij} - z_{i.})^2}$$

294 where  $n$  is the total sample size,  $k$  is the number of groups ( $k = 3$  in vQTL analysis),  $n_i$  is the  
 295 sample size of the  $i$ th group (one of three genotypes),  $z_{ij}$  is the absolute difference between  
 296 the phenotype value in sample  $j$  from genotype  $i$  and the median value in genotype  $i$ ,  $z_{i.}$  is the  
 297 average  $z$  value in genotype  $i$ , and  $z_{..}$  is the average  $z$  value across all samples. OSCA-  
 298 implemented Levene's test also provides beta and se estimates based on p-value and minor  
 299 allele frequency<sup>15</sup> and the beta estimates were used to construct vPGSs described later.

300 We estimated the study-wise significance for vQTL as  $4.6 \times 10^{-9} = 5 \times 10^{-8} / 10.2$   
 301 where 10.2 is the effective number of traits analysed in the study. The effective number of  
 302 traits is estimated using  $\frac{(\sum_{k=1}^p \lambda_k)^2}{\sum_{k=1}^p \lambda_k^2}$ , where  $\lambda_1 \dots \lambda_p$  is principal component variances or the  
 303 ordered eigenvalues<sup>15,17</sup>. To identify lead vQTL with relative independence, we used plink-  
 304 clumping<sup>48</sup> using a p-value threshold of  $4.6 \times 10^{-9}$ ,  $r^2 < 0.01$  and window size of 5000kb (the  
 305 same parameter used by<sup>15</sup>). The LD analysis between vQTL and lead QTL reported by  
 306 Vuckovic et al<sup>6</sup> used plink 1.9 with the function of --ld. The novel vQTL was defined as  
 307 those lead vQTL after clumping with GWAS p-value  $> 4.6 \times 10^{-9}$  in Vuckovic et al and with  
 308 LD- $r^2 < 0.8$  with lead QTL reported by Vuckovic et al. For vQTL mapping results of each  
 309 trait, we used LDSC<sup>26</sup> to estimate lambda-GC and intercept to check inflation. We also used  
 310 FUMA<sup>49</sup> to annotate significant vQTL for each trait with default settings. Results from  
 311 FUMA functions of SNP2GENE and GENE2FUNC were presented in the results.

312 To explore the potential causal relationships between alcohol consumption and blood  
 313 cell trait variances, we used GSMR<sup>30</sup> to discover the causal relationships and used MR-  
 314 PRESSO<sup>32</sup> and weighted-mean implemented in MendelianRandomisation<sup>33</sup> as validation. The  
 315 GWAS summary data for alcohol consumption was obtained from Cole et al<sup>31</sup>. Default  
 316 settings for nominated software were used and SNPs with p-value  $< 5e-8$  and  $r^2 < 0.05$  were

317 used in the analysis. Significant results were defined as the multi-testing adjusted p-value  
318 from GSMR  $< 0.05$  and the nominal significance was defined as the Mendelian  
319 Randomisation had raw p-value  $< 0.05$  in all 3 methods.

320 **Analysis of vPGS and PGS.** PGS trained using the elastic net from Xu 2022 et al<sup>7</sup>  
321 was used. For training vPGS, we followed the protocol described by Miao et al<sup>16</sup> reported  
322 successful implementation of vPGS for BMI using PRSICE<sup>34</sup>, we used the same procedure  
323 described by Miao et al to construct vPGS in the INTERVAL using PRSICE, i.e., `-clump-p1`  
324 `1 -clump-p2 1 -clump-r2 0.1` and `-clump-kb 1000`. When vPGS was computed for each trait,  
325 they were used to rank INTERVAL individuals where the top and bottom 5% of individuals  
326 were stratified. As vPGS was trained based on SNP effects on phenotypic variance, i.e., the  
327 extent to which the individual measurement deviates from the mean, vPGS was expected to  
328 genetically predict such variation of individuals for the corresponding trait. Therefore,  
329 individuals ranked in the top 5% of vPGS were called the genetically more variable group  
330 and individuals ranked in the bottom 5% of vPGS were called the genetically less variable  
331 group. Then, for each trait, within the more variable and less variable groups, we estimated  
332 the PGS accuracy, i.e., the correlation between PGS and the corresponding trait. We then  
333 compared the PGS accuracy between the more variable and less variable groups for each trait  
334 and the relative increase was calculated as  $\frac{r_{less\ variable} - r_{more\ variable}}{r_{more\ variable}}$  where  $r_{less\ variable}$  is the  
335 PGS accuracy in the less variable group defined by vPGS and  $r_{more\ variable}$  is the PGS  
336 accuracy in the more variable group defined by vPGS.

337 The effects of interaction between PGS and vPGS on the corresponding trait in  
338 INTERVAL were tested on corrected blood cell traits (described above). As the traits were  
339 already corrected for covariates, only the main effects and interaction of PGS and vPGS were  
340 fitted for each blood cell trait in the `lm()` function in R:  $y = PGS + vPGS + PGS * vPGS$ ,  
341 where y was each of the blood cell trait. The effects of interaction on specific traits (e.g.,

342 eo\_p and neut) were visualised using the function of plot\_model in the R package sjPlot  
343 (version 2.8.15).

344 To evaluate if adding vPGS improves PGS model predictability, we tested two sets of  
345 vPGS, where one set is the original single-trait vPGSs for 27 traits computed by PRSICE, and  
346 the other set is estimated using the multi-trait BLUP (SMTpred<sup>36</sup>) combining information  
347 from single-trait vPGSs. Following the instructions from  
348 <https://github.com/uqrmaie1/smtpred>, we used the LDSC<sup>26</sup> wrapper (ldsc\_wrapper.py) with  
349 default options in SMRpred to estimate the genetic parameters for each trait which are  
350 required inputs by the multi-trait BLUP. Then, the script smtpred.py was used by default  
351 options with the estimated genetic parameters to combine single-trait vPGSs to construct  
352 multi-trait vPGSs. Then, we used r2redux<sup>35</sup> to quantify the difference in variance explained  
353 ( $R^2$ ) between PGS models with and without vPGS. As described by Momin et al<sup>35</sup>, r2redux  
354 can powerfully detect  $R^2$  differences between models for the out-of-sample genomic  
355 prediction which is suitable to our case where the PGS and vPGS models were trained in the  
356 UK Biobank and predicted into INTERVAL. We followed the instructions provided by  
357 (<https://github.com/mommy003/r2redux>) to compare the  $R^2$  of models with vPGS and  
358 without PGS using the nested method and obtained p-values testing the significance of the  
359 increase in  $R^2$  when adding vPGS. The relative increase in  $R^2$  was expressed as the absolute  
360 difference in  $R^2$  divided by the heritability estimated using LDSC<sup>26</sup>.

361 To characterise the individuals that were identified as genetically variable across  
362 traits, we first counted the number of times (out of 27 blood cell traits) an individual was  
363 ranked in the top 5% by PGS for each trait. We also counted the number of times an  
364 individual was ranked in the bottom 5% by PGS for each trait. We then identified 2,465  
365 individuals who always ranked in the top 5% vPGS, and 2,362 individuals who always  
366 ranked in the bottom 5% vPGS across multiple blood traits. Individuals in the top group were

367 ranked in the top 5% vPGS for 4 to 17 traits with a mean of 5 and individuals in the bottom  
368 group were ranked in the bottom 5% vPGS for 4 to 23 traits with a mean of 9. Then, the top  
369 group was labelled as 1 and the bottom group was labelled as 0 and this 0/1 vector was  
370 analysed as a binary outcome for a logistic regression analysis against lifestyle factors:  $y =$   
371  $age + sex + BMI + smoking\_status + drinking\_status$ , where the average age is 46.1  
372 (SD=14.3) and the average BMI is 26.2 (SD=4.6); for sex, there are 2,419 women; for  
373 smoking status, there are 2,728 people never smoked, 378 current smokers, 1,634 previous  
374 smokers and 87 with no answers; for alcohol drinking status, there are 118 who never drunk,  
375 4,178 current drinkers, 323 previous drinkers and 208 with no answers. The logistic  
376 regression used the function `glm()` in R and for sex the male was set to the reference level, for  
377 smoking the level of never smoked was set to the reference and for drinking the level of  
378 never drunk was set to the reference. The same analysis was also applied to individual blood  
379 cell traits of mean corpuscular volume (mcv), neutrophil percentage of white cells (neut\_p)  
380 and red blood cell count (rbc) which were significant in Mendelian Randomisation analyses.

381

## 382 **Data availability**

383 Full summary statistics of vQTL mapping are available via the GWAS Catalog  
384 (<https://www.ebi.ac.uk/gwas/>) under the accession number NNNNNNNNNN (*to be generated*  
385 *upon acceptance of peer-reviewed manuscript*). All data described are available through the  
386 UK Biobank subject to approval from the UK Biobank access committee. See  
387 <https://www.ukbiobank.ac.uk/enable-your-research/apply-for-access> for further details.

388 INTERVAL study data from this paper are available to bona fide researchers from  
389 [helpdesk@intervalstudy.org.uk](mailto:helpdesk@intervalstudy.org.uk) and information, including the data access policy, is available  
390 at <http://www.donorhealth-btru.nihr.ac.uk/project/bioresource>.

391



## 392 **Code availability**

393 The manuscript does not produce original code. vQTL mapping used OSCA:  
394 <https://yanglab.westlake.edu.cn/software/osca/#Overview>; genetic correlation analysis used  
395 LDSC: <https://github.com/bulik/ldsc>; pleiotropy analysis: <https://github.com/rondolab/HOPS>.  
396 Mendelian randomisation used GSMR: <https://yanglab.westlake.edu.cn/software/gsmr/>, MR-  
397 PRESSO: <https://github.com/rondolab/MR-PRESSO> and MendelianRandomisation:  
398 <https://cran.r-project.org/web/packages/MendelianRandomization/index.html>; Analysis of  
399 selection used GCTB-BayesS:  
400 <https://cnsgenomics.com/software/gctb/#SummaryBayesianAlphabet>; vPGS analysis used  
401 PRSICE: <https://choishingwan.github.io/PRSice/> and plink2: <https://www.cog->  
402 [genomics.org/plink/2.0/](https://www.cog-genomics.org/plink/2.0/); multi-trait GBLUP used SMTpred:  
403 <https://github.com/uqrmaie1/smtpred>; significance tests of  $R^2$  increase used r2redux:  
404 <https://github.com/mommy003/r2redux>; logistic regression analysis used glm():  
405 <https://www.rdocumentation.org/packages/stats/versions/3.6.2/topics/glm>.

406

## 407 **Competing interests**

408 M.I. is a trustee of the Public Health Genomics (PHG) Foundation, a member of the  
409 Scientific Advisory Board of Open Targets, and has research collaborations with  
410 AstraZeneca, Nightingale Health and Pfizer which are unrelated to this study.

411

## 412 **Funding**

413 The authors are grateful to UK Biobank for access to data to undertake this study (Projects  
414 #30418).

415

416 This work was supported by core funding from the: British Heart Foundation  
417 (RG/18/13/33946) and NIHR Cambridge Biomedical Research Centre (NIHR203312),  
418 Cambridge BHF Centre of Research Excellence (RE/18/1/34212) and BHF Chair Award  
419 (CH/12/2/29428) and by Health Data Research UK, which is funded by the UK Medical  
420 Research Council, Engineering and Physical Sciences Research Council, Economic and  
421 Social Research Council, Department of Health and Social Care (England), Chief Scientist  
422 Office of the Scottish Government Health and Social Care Directorates, Health and Social  
423 Care Research and Development Division (Welsh Government), Public Health Agency  
424 (Northern Ireland), British Heart Foundation and Wellcome.

425

426 X.J. was funded by the British Heart Foundation (CH/12/2/29428) and Wellcome Trust  
427 (227566/Z/23/Z). S.C.R. was funded by a British Heart Foundation (BHF) Programme Grant  
428 (RG/18/13/33946). S.C.R. was also funded by the National Institute for Health and Care  
429 Research (NIHR) Cambridge BRC (BRC-1215-20014; NIHR203312) [\*]. Y.X. and M.I.  
430 were supported by the UK Economic and Social Research Council (ES/T013192/1). M.I. and  
431 S.L. were supported by NIH U24 (5U24HG012542-02). M.I. is supported by the Munz Chair  
432 of Cardiovascular Prediction and Prevention and the NIHR Cambridge Biomedical Research  
433 Centre (NIHR203312) [\*]. \*The views expressed are those of the authors and not necessarily  
434 those of the NIHR or the Department of Health and Social Care.

435

#### 436 **Author contributions**

437 R.X. and M.I. conceived of the study. R.X. performed the analyses with assistance from Y.X.  
438 and M.I.. R.X., M.I., F.T., Y.L., C.B.E., X.J., S.R., S.A.L., and Y.X. drafted and revised the  
439 manuscript. All authors read and approved the final version of the manuscript.

440

441 **Acknowledgements**

442 We thank Dr. Emmanuela Bonglack and Dr. Xilin Jiang, for their insightful comments. The  
443 authors are grateful to Prof. Michael Goddard for discussions on the selection of vQTL.

444

445

446 **References**

- 447 1 Horton, S. *et al.* The top 25 laboratory tests by volume and revenue in five different  
448 countries. *Am J Clin Pathol* **151**, 446-451 (2019).
- 449 2 Jensen, F. B. The dual roles of red blood cells in tissue oxygen delivery: oxygen carriers  
450 and regulators of local blood flow. *J Exp Biol* **212**, 3387-3393 (2009).
- 451 3 Jenne, C., Urrutia, R. & Kubes, P. Platelets: bridging hemostasis, inflammation, and  
452 immunity. *Int J Lab Hematol* **35**, 254-261 (2013).
- 453 4 Nagata, S. Apoptosis and clearance of apoptotic cells. *Annu Rev Immunol* **36**, 489-517  
454 (2018).
- 455 5 Astle, W. J. *et al.* The allelic landscape of human blood cell trait variation and links to  
456 common complex disease. *Cell* **167**, 1415-1429. e1419 (2016).
- 457 6 Vuckovic, D. *et al.* The polygenic and monogenic basis of blood traits and diseases. *Cell*  
458 **182**, 1214-1231. e1211 (2020).
- 459 7 Xu, Y. *et al.* Machine learning optimized polygenic scores for blood cell traits identify  
460 sex-specific trajectories and genetic correlations with disease. *Cell Genomics* **2** (2022).
- 461 8 Yang, Y. *et al.* The shared genetic landscape of blood cell traits and risk of neurological  
462 and psychiatric disorders. *Cell Genomics* **3** (2023).
- 463 9 Akbari, P. *et al.* A genome-wide association study of blood cell morphology identifies  
464 cellular proteins implicated in disease aetiology. *Nat Commun* **14**, 5023 (2023).
- 465 10 Duveau, F. *et al.* Fitness effects of altering gene expression noise in *Saccharomyces*  
466 *cerevisiae*. *eLife* **7**, e37272 (2018). <https://doi.org:10.7554/eLife.37272>
- 467 11 Sarkar, A. K. *et al.* Discovery and characterization of variance QTLs in human induced  
468 pluripotent stem cells. *PLoS Genet* **15**, e1008045 (2019).  
469 <https://doi.org:10.1371/journal.pgen.1008045>
- 470 12 Pettersen, A. K., Marshall, D. J. & White, C. R. Understanding variation in metabolic  
471 rate. *J Exp Biol* **221**, jeb166876 (2018).
- 472 13 Kimura, M. A stochastic model concerning the maintenance of genetic variability in  
473 quantitative characters. *PNAS* **54**, 731-736 (1965).
- 474 14 Sanjak, J. S., Sidorenko, J., Robinson, M. R., Thornton, K. R. & Visscher, P. M. Evidence  
475 of directional and stabilizing selection in contemporary humans. *PNAS* **115**, 151-156  
476 (2018).
- 477 15 Wang, H. *et al.* Genotype-by-environment interactions inferred from genetic effects on  
478 phenotypic variability in the UK Biobank. *Science advances* **5**, eaaw3538 (2019).
- 479 16 Miao, J. *et al.* A quantile integral linear model to quantify genetic effects on phenotypic  
480 variability. *PNAS* **119**, e2212959119 (2022).
- 481 17 Westerman, K. E. *et al.* Variance-quantitative trait loci enable systematic discovery of  
482 gene-environment interactions for cardiometabolic serum biomarkers. *Nat Commun* **13**,  
483 3993 (2022).

- 484 18 Paré, G., Cook, N. R., Ridker, P. M. & Chasman, D. I. On the use of variance per  
485 genotype as a tool to identify quantitative trait interaction effects: a report from the  
486 Women's Genome Health Study. *PLoS Genet* **6**, e1000981 (2010).
- 487 19 Lambert, S. A., Abraham, G. & Inouye, M. Towards clinical utility of polygenic risk  
488 scores. *Hum Mol Genet* **28**, R133-R142 (2019).
- 489 20 Alliance, P. R. S. T. F. o. t. I. C. D. Responsible use of polygenic risk scores in the clinic:  
490 potential benefits, risks and gaps. *Nat Med* **27**, 1876-1884 (2021).
- 491 21 Xiang, R. *et al.* Recent advances in polygenic scores: translation, equitability, methods  
492 and FAIR tools. *Genome Med* **16**, 33 (2024).
- 493 22 Ding, Y. *et al.* Polygenic scoring accuracy varies across the genetic ancestry continuum.  
494 *Nature* **618**, 774-781 (2023). <https://doi.org/10.1038/s41586-023-06079-4>
- 495 23 Moore, C. *et al.* The INTERVAL trial to determine whether intervals between blood  
496 donations can be safely and acceptably decreased to optimise blood supply: study  
497 protocol for a randomised controlled trial. *Trials* **15**, 1-11 (2014).
- 498 24 Levene, H. Robust tests for equality of variances. *Contributions to probability and*  
499 *statistics*, 278-292 (1960).
- 500 25 Zhang, F. *et al.* OSCA: a tool for omic-data-based complex trait analysis. *Genome Biol*  
501 **20**, 1-13 (2019).
- 502 26 Bulik-Sullivan, B. K. *et al.* LD Score regression distinguishes confounding from  
503 polygenicity in genome-wide association studies. *Nat Genet* **47**, 291-295 (2015).
- 504 27 Jordan, D. M., Verbanck, M. & Do, R. HOPS: a quantitative score reveals pervasive  
505 horizontal pleiotropy in human genetic variation is driven by extreme polygenicity of  
506 human traits and diseases. *Genome Biol* **20**, 1-18 (2019).
- 507 28 Zeng, J. *et al.* Signatures of negative selection in the genetic architecture of human  
508 complex traits. *Nat Genet* **50**, 746-753 (2018).
- 509 29 Zhou, H. *et al.* Genome-wide meta-analysis of problematic alcohol use in 435,563  
510 individuals yields insights into biology and relationships with other traits. *Nat Neurosci*  
511 **23**, 809-818 (2020).
- 512 30 Zhu, Z. *et al.* Causal associations between risk factors and common diseases inferred from  
513 GWAS summary data. *Nat Commun* **9**, 1-12 (2018).
- 514 31 Cole, J. B., Florez, J. C. & Hirschhorn, J. N. Comprehensive genomic analysis of dietary  
515 habits in UK Biobank identifies hundreds of genetic associations. *Nat Commun* **11**, 1467  
516 (2020).
- 517 32 Verbanck, M., Chen, C.-Y., Neale, B. & Do, R. Detection of widespread horizontal  
518 pleiotropy in causal relationships inferred from Mendelian randomization between  
519 complex traits and diseases. *Nat Genet* **50**, 693-698 (2018).
- 520 33 Yavorska, O. O. & Burgess, S. MendelianRandomization: an R package for performing  
521 Mendelian randomization analyses using summarized data. *Int J Epidemiol* **46**, 1734-1739  
522 (2017).
- 523 34 Choi, S. W. & O'Reilly, P. F. PRSice-2: Polygenic Risk Score software for biobank-scale  
524 data. *Gigascience* **8**, giz082 (2019).
- 525 35 Momin, M. M., Lee, S., Wray, N. R. & Lee, S. H. Significance tests for R<sup>2</sup> of out-of-  
526 sample prediction using polygenic scores. *Am J Hum Genet* **110**, 349-358 (2023).
- 527 36 Maier, R. M. *et al.* Improving genetic prediction by leveraging genetic correlations among  
528 human diseases and traits. *Nat Commun* **9**, 989 (2018).
- 529 37 Rönnegård, L. & Valdar, W. Detecting major genetic loci controlling phenotypic  
530 variability in experimental crosses. *Genetics* **188**, 435-447 (2011).
- 531 38 Pirastu, N. *et al.* Using genetic variation to disentangle the complex relationship between  
532 food intake and health outcomes. *PLoS Genet* **18**, e1010162 (2022).

- 533 39 Westerman, K. E. *et al.* Genome-wide gene–diet interaction analysis in the UK Biobank  
534 identifies novel effects on hemoglobin A1c. *Hum Mol Genet* **30**, 1773-1783 (2021).
- 535 40 Thompson, A., King, K., Morris, A. P. & Pirmohamed, M. Assessing the impact of  
536 alcohol consumption on the genetic contribution to mean corpuscular volume. *Hum Mol*  
537 *Genet* **30**, 2040-2051 (2021).
- 538 41 Pashek, R. E. *et al.* Alcohol intake including wine drinking is associated with decreased  
539 platelet reactivity in a large population sample. *Int J Epidemiol*, dyad099 (2023).
- 540 42 Selzam, S. *et al.* Comparing within-and between-family polygenic score prediction. *Am J*  
541 *Hum Genet* **105**, 351-363 (2019).
- 542 43 Abdellaoui, A., Dolan, C. V., Verweij, K. J. & Nivard, M. G. Gene–environment  
543 correlations across geographic regions affect genome-wide association studies. *Nat Genet*  
544 **54**, 1345-1354 (2022).
- 545 44 Ballard, H. S. The hematological complications of alcoholism. *Alcohol Health Res World*  
546 **21**, 42 (1997).
- 547 45 Thom, C. S., Wilken, M. B., Chou, S. T. & Voight, B. F. Body mass index and adipose  
548 distribution have opposing genetic impacts on human blood traits. *Elife* **11**, e75317  
549 (2022).
- 550 46 Sudlow, C. *et al.* UK biobank: an open access resource for identifying the causes of a  
551 wide range of complex diseases of middle and old age. *PLoS Med* **12**, e1001779 (2015).
- 552 47 Bycroft, C. *et al.* The UK Biobank resource with deep phenotyping and genomic data.  
553 *Nature* **562**, 203-209 (2018).
- 554 48 Chang, C. C. *et al.* Second-generation PLINK: rising to the challenge of larger and richer  
555 datasets. *Gigascience* **4**, 7 (2015). <https://doi.org/10.1186/s13742-015-0047-8>
- 556 49 Watanabe, K., Taskesen, E., Van Bochoven, A. & Posthuma, D. Functional mapping and  
557 annotation of genetic associations with FUMA. *Nat Commun* **8**, 1826 (2017).
- 558
- 559

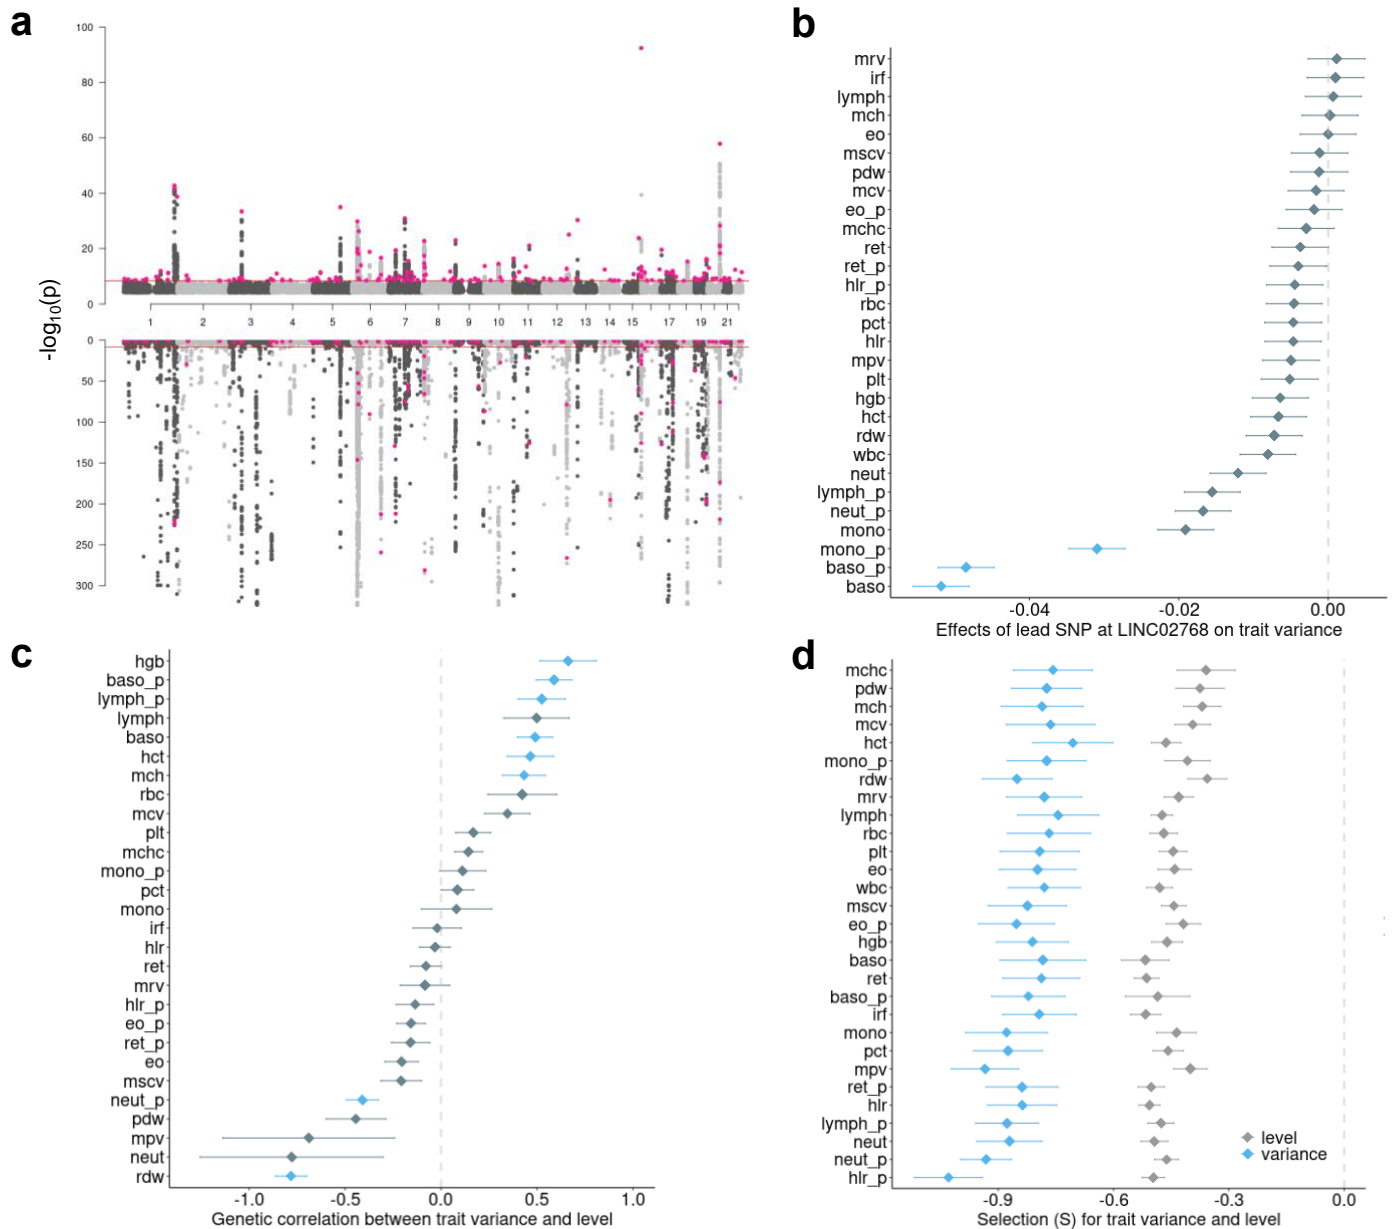

560 **Figure 1.** vQTLs for 29 blood cell traits and their comparison with additive QTLs. **a:** Miami  
561 plot showing the best (smallest p-value) vQTLs across 29 blood cell traits (top plot) and the  
562 corresponding best additive QTLs (bottom plot). Red dots are genome-wide significant  
563 independent vQTLs. **b:** Example of pleiotropic effects of the C allele of rs10803164 for the  
564 long non-coding RNA *LINC02768* on blood cell trait variance. Blue indicates the effect on  
565 trait variance had  $p < 4.6 \times 10^{-9}$  (study-wide GWAS significance). **c:** Genetic correlation  
566 between blood cell trait variance and trait level. Blue indicates the correlation had multi-  
567 testing adjusted  $p < 0.05$ . **d:** Selection coefficient estimated by BayesS<sup>28</sup> for trait variance  
568 and level.  
569

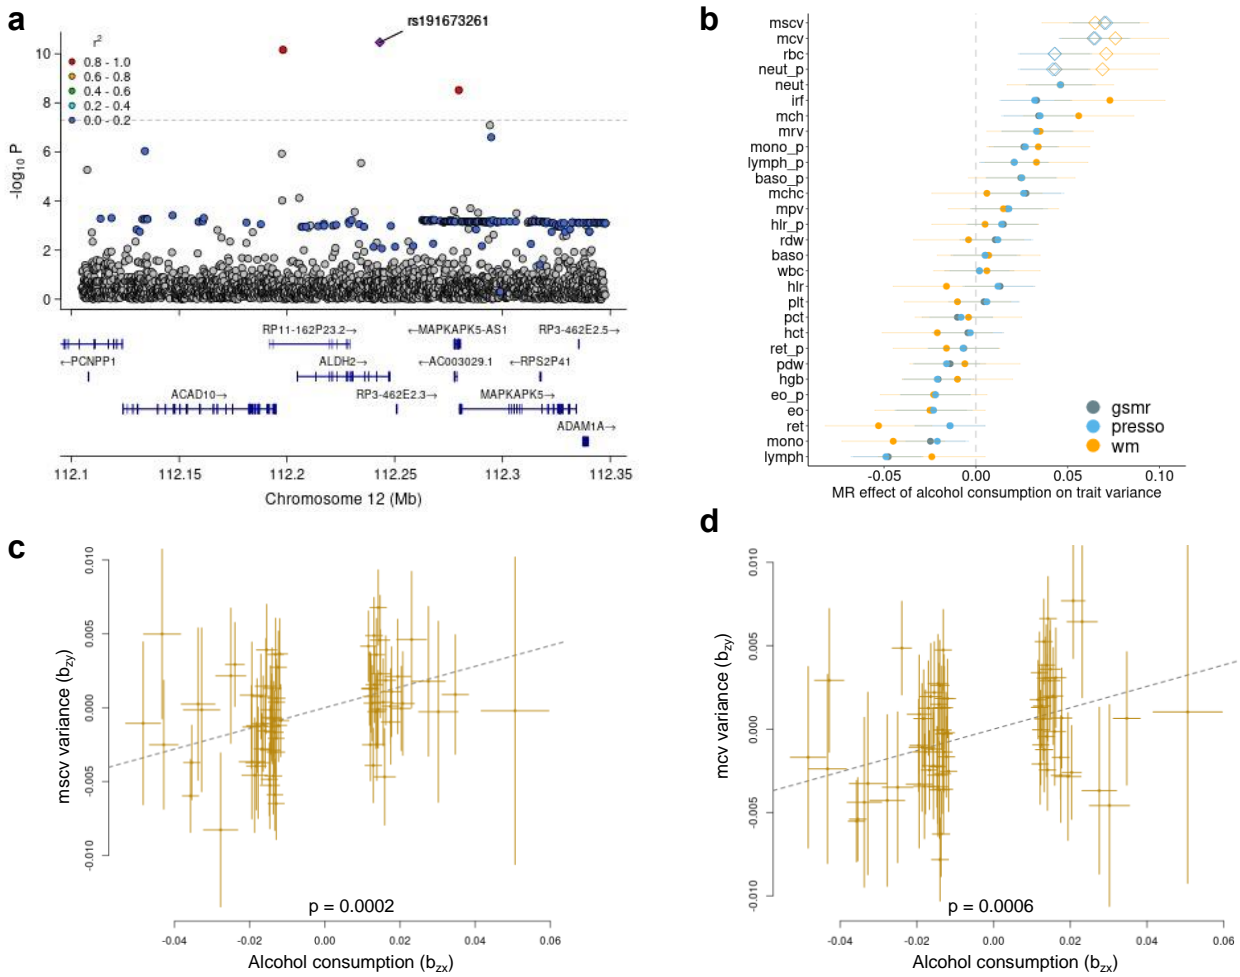

571 **Figure 2. a:** LocusZoom plot of variance QTL mapping for platelet crit (pct) variance at  
 572 ALDH2 gene; **b:** Mendelian randomization (MR) of alcohol consumption on variance of blood  
 573 cell traits using GSMR<sup>30</sup>, MR-PRESSO (presso)<sup>32</sup> and weighted-median (wm)<sup>33</sup>. Diamonds:  
 574 significant in 3 methods; grey dots:  $p \geq 0.05$ ; the error bars indicate standard errors; **c:** Effects  
 575 of MR of alcohol consumption on variance of corpuscular hemoglobin concentration (mscv);  
 576 **d:** Effects of MR of alcohol consumption on variance of corpuscular volume variance (mcv).  
 577 Dashed fitted lines indicate the coefficient of Mendelian Randomisation ( $b_{xy}=0.07$ ,  $se_{xy}=0.019$   
 578 for mscv and  $b_{xy}=0.064$ ,  $se_{xy}=0.0188$  for mcv).  
 579

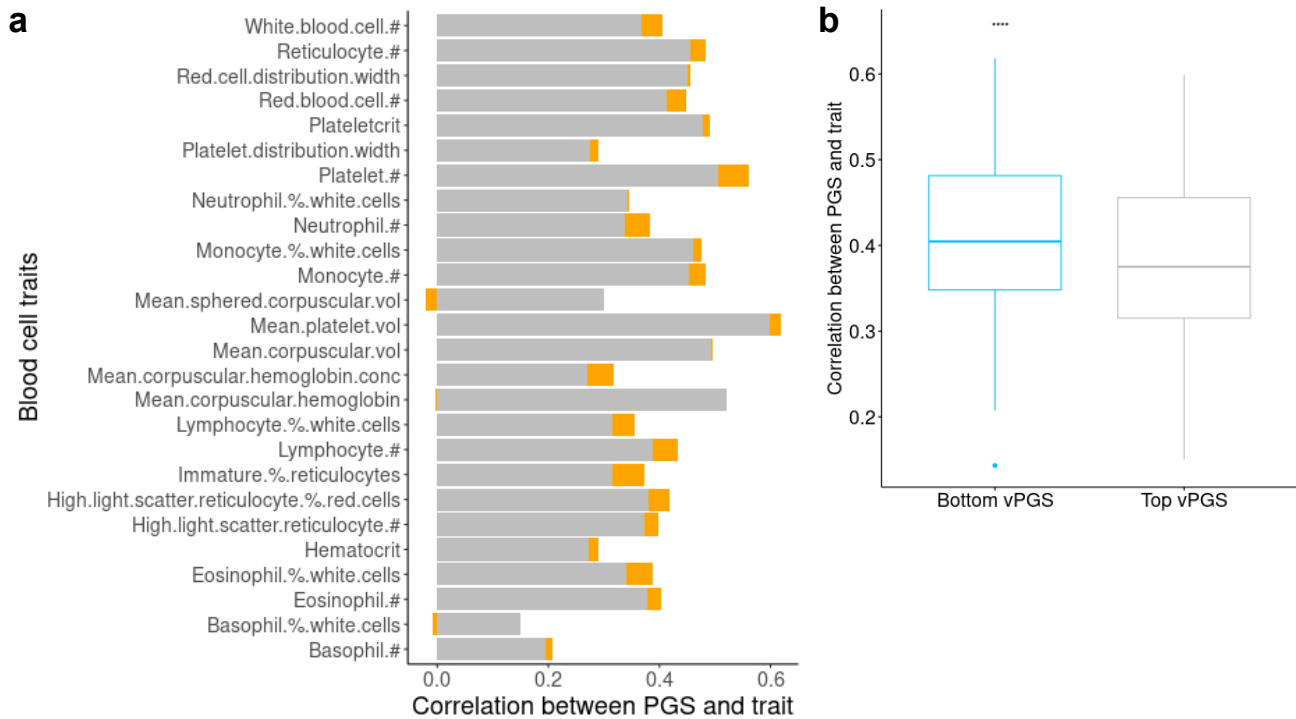

580 **Figure 3.** The variation in the accuracy of PGSs for 27 blood cell traits (Pearson correlation)  
 581 between the top and bottom vPGS groups. **a:** Accuracy of PGS in the top vPGS group (more  
 582 variable group, grey colour) and the difference (orange) of PGS between the top vPGS group  
 583 and the bottom vPGS group (less variable group). #: count; % percentage; vol: volume; conc:  
 584 concentration. **b:** Difference of accuracy of PGS between the bottom and top vPGS groups  
 585 across 27 blood cell traits. \*\*\*\*:  $p < 0.0001$ .  
 586



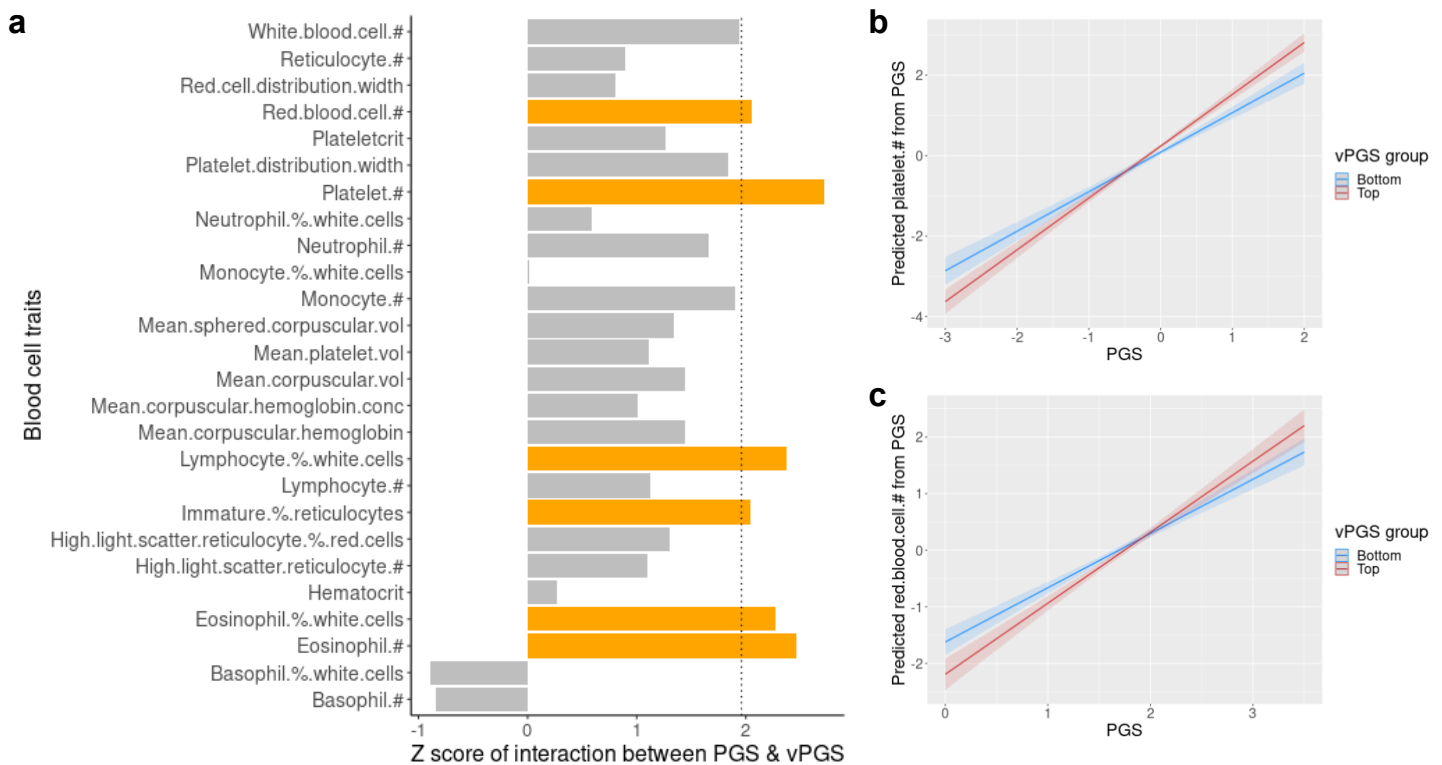

588 **Figure 4.** Effects of interaction between PGS and vPGS on blood cell traits. **a:** Effects of  
 589 interaction across 27 traits in INTERVAL. The vertical dashed line indicates the z-score  
 590 value = 1.96 which equals p-value = 0.05 and bars with z-score value > 1.96 (p < 0.05) are in  
 591 orange color. #: count; % percentage; vol: volume; conc: concentration. **b-c:** Examples of  
 592 visualised effects of interaction for eosinophil percentage of white cells (eo\_p) and neutrophil  
 593 count (neut).  
 594

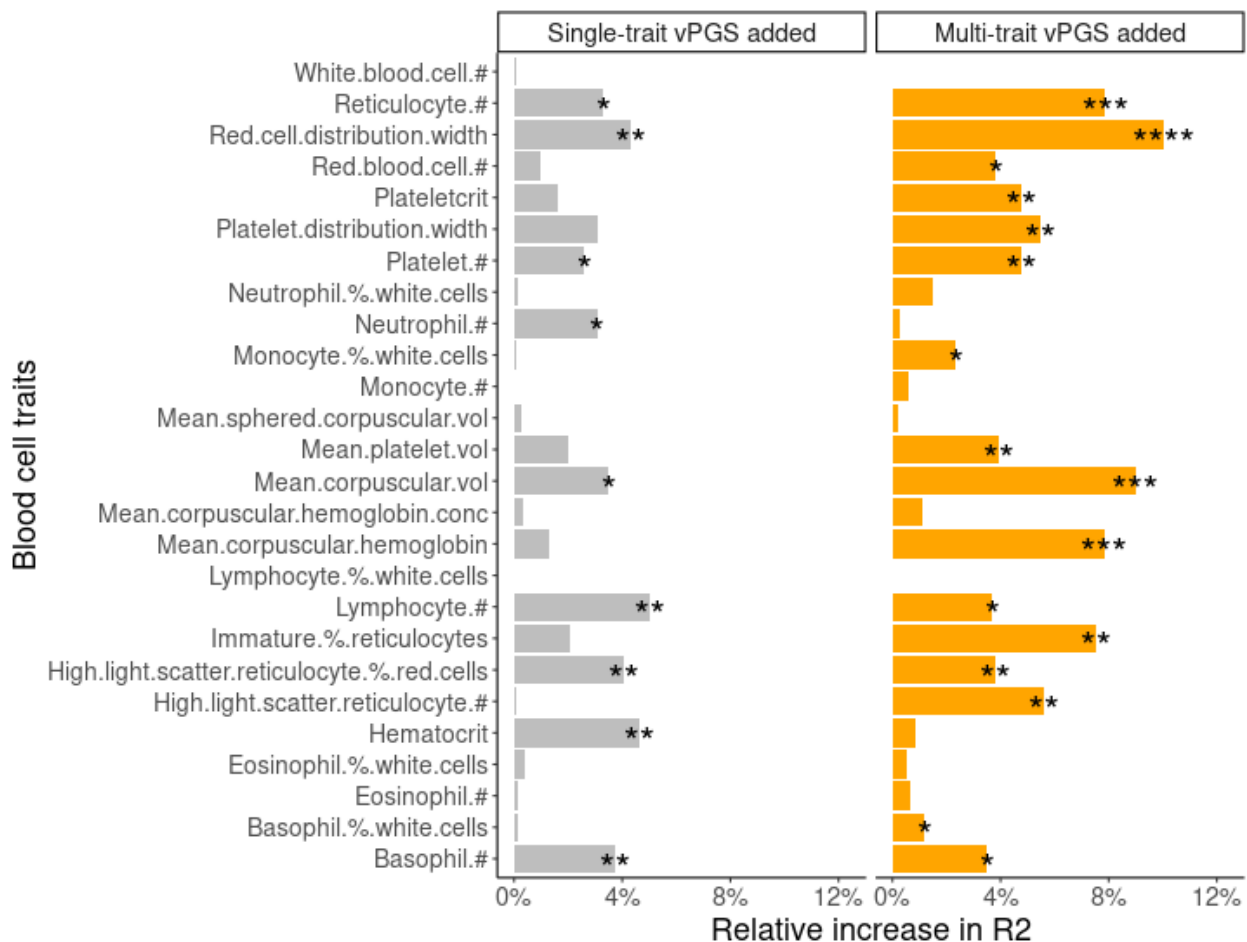

595 **Figure 5.** The difference in the variance explained ( $R^2$ ) between PGS models with or without  
596 vPGS. Each bar represents the relative increase in  $R^2$  for the blood cell trait when the PGS  
597 model added vPGS. In the left panel, the single-trait vPGS was added to PGS. In the right  
598 panel, multi-trait vPGS was added to PGS. #: count; % percentage; vol: volume; conc:  
599 concentration. \*:  $p < 0.05$ ; \*\*:  $p < 0.01$ ; \*\*\*:  $p < 0.001$  and \*\*\*\*:  $p < 0.0001$ . P-values were  
600 estimated by comparing models with and without vPGS using *r2redux*<sup>35</sup>.  
601

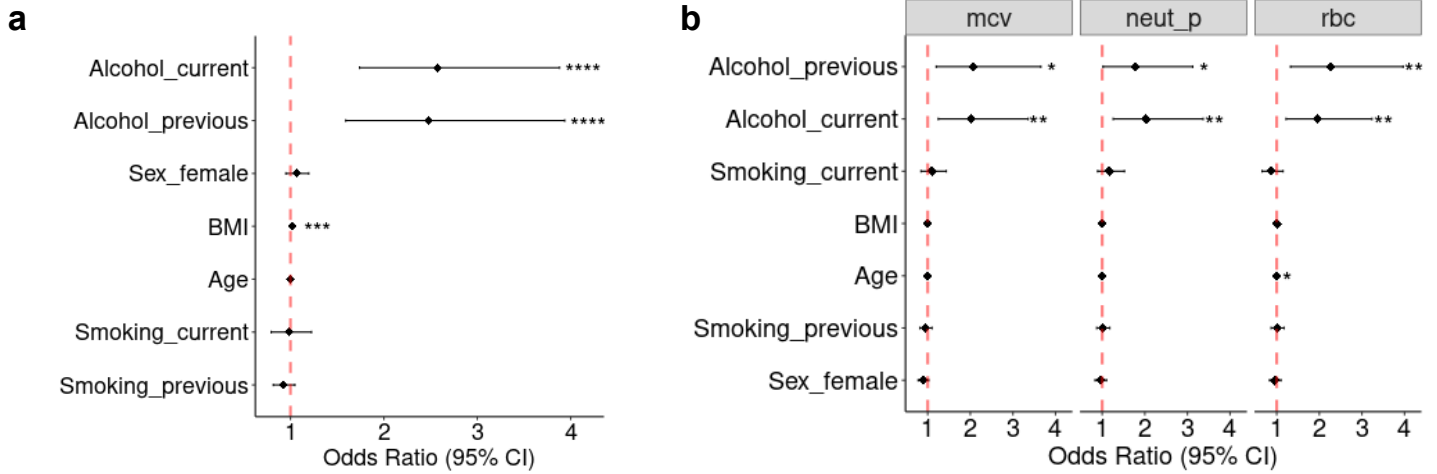

602 **Figure 6.** Association between BMI, age, alcohol drinking and smoking and individuals to be  
 603 genetically variable across blood cell traits in INTERVAL. **a:** an overall estimate across 27  
 604 blood cell traits. **b:** Estimates for mean corpuscular volume (mcv), neutrophil percentage of  
 605 white cells (neut\_p) and red blood cell count (rbc) which were significant Mendelian  
 606 Randomisation analyses. \*:  $p < 0.05$ ; \*\*:  $p < 0.01$ ; \*\*\*:  $p < 0.001$  and \*\*\*\*:  $p < 0.0001$ .  
 607
